# Supplementary material for: Exploring the severe winter haze in Beijing: the impact of synoptic weather, regional transport and heterogeneous reactions
Source: Copernicus journal article supplement (doi:10.5194/acp-15-2969-2015), 2015-03-17
Supplement: Supplementary file 1 [file acp-15-2969-2015-supplement.pdf]

Supplement of Atmos. Chem. Phys., 15, 2969–2983, 2015  
<http://www.atmos-chem-phys.net/15/2969/2015/>  
doi:10.5194/acp-15-2969-2015-supplement  
© Author(s) 2015. CC Attribution 3.0 License.

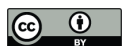

Atmospheric  
Chemistry  
and Physics  
Open Access 

*Supplement of*

## **Exploring the severe winter haze in Beijing: the impact of synoptic weather, regional transport and heterogeneous reactions**

**G. J. Zheng et al.**

*Correspondence to:* K. B. He ([hekb@mail.tsinghua.edu.cn](mailto:hekb@mail.tsinghua.edu.cn)) and Y. F. Cheng ([yafang.cheng@mpic.de](mailto:yafang.cheng@mpic.de))

Table S1. Original CMAQ simulated domain-average concentration of pollutant to EC ratios during daytime (7:00~18:00) at different pollution levels

| <b>Pollution Level</b>   | <b>PM<sub>2.5</sub>/EC</b> | <b>POM/EC</b> | <b>SO<sub>4</sub><sup>2-</sup>/EC</b> | <b>NO<sub>3</sub><sup>-</sup>/EC</b> |
|--------------------------|----------------------------|---------------|---------------------------------------|--------------------------------------|
| <i>Clean</i>             | 16.05                      | 3.03          | 3.50                                  | 3.17                                 |
| <i>Slightly Polluted</i> | 14.69                      | 3.09          | 2.83                                  | 3.00                                 |
| <i>Polluted</i>          | 12.97                      | 3.22          | 2.19                                  | 2.53                                 |
| <i>Heavily Polluted</i>  | 11.72                      | 3.27          | 1.69                                  | 2.26                                 |
